# Supplementary material
Source: publisher figshare collection journal article supplement (https://gsapubs.figshare.com/ndownloader/files/22408467)
Supplement: Supplementary file 1 [file 22408467]

## Sheet: data
Appendix 1: Bulk rock geochemistry
Sample	SiO2	TiO2	Al2O3	Fe2O3	FeO	MnO	MgO	CaO	Na2O	K2O	P2O5	LOI	TOTAL	Mg/(Mg+Fet)		Sc	V	Cr	Co	Ni	Cu	Zn	Ga	Rb	Sr	Y	Zr	Nb	Cs	Ba	La	Ce	Pr	Nd	Sm	Eu	Gd	Tb	Dy	Ho	Er	Tm	Yb	Lu	Hf	Ta	Th	U
	blank cell indicates element/oxide not analyzed
Slinkard pluton
CAII	53.43	0.42	16.43	8.24		0.15	7.73	10.6	2.47	0.46	0.07	0.25	100.25	0.65				180		36				5	348		14			362
CAIII	77.34	0.07	13.78	1.42		0.03	0.14	1.76	4.13	2.68	0.01	0.39	101.75	0.16		1.7		2	1.1					73.5	288		106		3	1080	28.6	48.1		18.8	2.63	0.73		0.29					1.02	0.2	4.06	0.37	6.69	1.16
CAIV	58.46	0.55	16.09	6.78		0.12	5.11	7.33	2.95	1.44	0.11	0.64	99.58	0.6		32.2		122	25	31				40.4	338		86	10	2	619	13.6	26.7		14.5	3.09	1.12		0.45					2.21	0.29	3.43	0.26	2.52	0.52
MMB-53	53.81	0.46	15.61	0	9.81	0.17	8.17	10.25	1.98	0.25	0.03		100.54	0.6
MMB-642A	74.88	0.24	14.23	0.23	1.19	0.03	0.2	1.6	3.97	2.74	0.01	0.45	99.77	0.2		1.6		2.36	42.1					75.4	327		94	7.4	2.8	1346	23.8	44.8		15.9	2.37	0.68		0.22					1.13	0.19	3.63	3.69	7.02	1.81
MMB-642B	75.12	0.2	14.25	0.98		0.04	0.11	1.12	3.88	3.54	0.01	0.49	99.74	0.18										76.8	171
MMB-645A	55.27	0.62	17.38	0.2	8.29	0.16	5.93	9.28	2.29	0.19	0.05	0.13	99.79	0.56		32.1		97	32.7					2	250					251	3.9	7.8		5.2	1.26	0.52		0.32					1.4	0.18	1.18	0.84
MMB-645B	53.81	0.47	15.32	1.16	7.19	0.18	7.72	9.55	2.33	0.34	0.06	1.08	99.21	0.63										1.1	240		33
SL15	72.28	0	14.5	0.08		dl	dl	0.14	2.03	9.88	0.02	0.33	99.26											198	39		10
SL20	69.05	0.29	16.77	2.71		0.05	0.84	3.33	5.17	1.86	0.12	0.55	100.74	0.38										200	410		165
SL51IIA	50.33	0.27	4.33	8.45		0.17	17.34	17.05	0.5	0.18	0.04	0.36	99.02	0.8				1510		136				5	49		14			27
SL60A	59.27	0.56	15.4	6.46		0.12	5.07	7.47	2.59	1.35	0.1	1.8	100.19	0.61										38.4	249		90
SL71A	55.14	0.27	15.15	7.3		0.15	7.24	9.79	2.35	0.78	0.09	1.78	100.04	0.66
SL95A	58.09	0.65	15.86	6.36		0.11	6.06	7.45	2.7	1.34	0.11	1.16	99.89	0.65										32.1	275		102
SL117A	62.86	0.51	17.12	4.59		0.08	3.62	5.95	3.51	1.65	0.13	1	101.02	0.61		22.5		129	21	37				46.4	347		109	14	3.4	1130	14.6	29.6		13	2.93	1.12		0.37					1.76	0.29	4.75	0.52	4.3	1.11
SL147	50.2	0.8	11.05	8.98		0.17	12.93	12.9	2.56	0.93	0.16	1.23	101.91	0.74										22.8	135		39
SL149	67.42	0.35	16.26	2.96		0.07	1.27	3.62	4.5	2.08	0.12	0.76	99.41	0.46		6.6		9.2	5.6	11				47.6	545				2.1	1220	20.3	43.1		15.4	3.15	1.1		0.39				0.21	1.41	0.22	5.03	0.46	4.16	0.85
SL284A	52.62	0.5	16.91	7.92		0.13	8.13	9.14	2.22	0.91	0.1	1.92	100.5	0.67										20.6	274		52
SL286A	78.48	0	13.53	0.5		0.03	0.12	0.78	4.44	3.83	0.08	0.23	102.02	0.32										137	28		36
WCB-2108	76.33	0.08	13.9	1.19		0.04	0.22	1.72	4.13	2.76	0.02	0.52	100.91	0.27		1.7	2	1	0.8	dl	19	36	14.4	70.4	230	6.7	91	8.1	3.6	1103	20.2	31.4	3.35	12.2	2.02	0.61	1.42	0.2	1.12	0.25	0.74	0.13	0.87	0.15	2.55	0.36	5.09	1.5
WCB-8309	51.65	0.65	16.22	8.77		0.16	8.13	10.43	1.89	0.59	0.07	0.95	99.52	0.65		42.8	206	254		49	7	82		11.7	254	18.5	69	3.9	0.7	307	8.2	17.7	2.42	10.4	2.74	0.95	3.05	0.54	3.47	0.74	2.05	0.3	1.92	0.3	1.83	0.21	0.86	0.4
WCB-8409	59.55	0.6	15.88	6.11		0.12	5.43	7.52	2.77	1.52	0.11	0.7	100.31	0.64		23.8	104	218	22.7	36	35	70	15.3	48.9	254	15.9	125	6.9	4.7	688	10.1	22	2.54	11.1	2.65	0.84	2.61	0.42	2.74	0.63	1.77	0.28	1.8	0.28	2.86	0.54	3.09	1.34
WCB-8909	54.17	0.55	16.09	8.6		0.16	7.1	10.09	2.24	0.5	0.08	2.05	101.63	0.62		38.9	201	141	31.4	33	46	84	16.8	2.8	312	13.3	187	1.8	0.3	402	6.4	11.7	1.64	8.1	2.24	0.85	2.36	0.38	2.59	0.61	1.68	0.27	1.7	0.26	4.09	0.09	0.04	0.04
WCB-9009	55.12	0.62	17.26	8.48		0.15	5.88	9.18	2.6	0.35	0.06	0.11	99.81	0.58		33.7	201	110		23	18	67		0.9	298	11.6	39	2	0.1	342	6.1	11.8	1.53	6.7	1.77	0.73	1.97	0.34	2.18	0.47	1.29	0.19	1.21	0.19	0.74	0.11	0.05	0.03
Wooley Creek batholith
lower zone
MMB-15	60.24	0.59	15.28	6.42		0.11	4.22	7.13	2.71	1.38	0.09	2.27	100.44	0.57		26.2		118	19					32.1	243		81		2.5	608	10.5	21		10.2	2.29	0.73		0.42					1.34	0.27	3.7	0.28	1.52
MMB-30	60.17	0.53	15.28	6.47		0.13	5.14	7.63	2.45	1.16	0.07	0.37	99.4	0.61		28.9	164	144		41	27	62		31.6	252	13.8	81	3	2.4	580	9.4	17.6	2.23	9	2.2	0.74	2.34	0.39	2.53	0.54	1.53	0.23	1.43	0.23	1.76	0.84	2.59	0.94
MMB-100	49.09	0.23	4.67	10.34		0.18	17.8	14.89	0.32	0.11	0.01	1.94	99.58	0.77		60.6		1362	65.7	269					55		13				1.7	6.1			1.37	0.49		0.34					0.64	0.2	0.35
MMB-100 dup	49.4	0.31	4.79	10.18		0.19	19.96	15.57	0.31	0.07	dl	2.2	102.93	0.8		74	232	2966		405	158	63			70	9.4	13			61
MMB-10379	52.92	0.54	16.78	8.41		0.15	6.74	9.35	2.43	1	0.19	0.85	99.37	0.61		34.4	230	134	43.6	15	44	70	16.6	19.7	443.7	14.3	44	2.9	1	410	10.9	20.8	2.73	12.4	2.99	1.08	2.72	0.4	2.48	0.55	1.47	0.23	1.38	0.22	1.88	0.81	1.19	0.69
MMB-11179	58.21	0.51	16.11	6.99		0.13	5.92	7.6	2.65	1.32	0.09	0.41	99.94	0.63		31	161	131	33.6	18	32	74	15.3	31.4	253	13.6	79	3.5	2	585	9.6	17	2.11	9.3	2.29	0.75	2.3	0.36	2.5	0.58	1.6	0.26	1.6	0.25	1.78	0.68	2.52	1
MMB-121	49.99	0.29	15.54	9.67		0.17	8.97	11.61	1.52	0.28	0.02	2.62	100.68	0.65						69				7.5	347		15
MMB-128A	51.78	0.8	9.1	10.91		0.19	13.31	11.23	2.16	0.73	0.12		100.33	0.71
MMB-171	50.83	0.61	5.35	12.76		0.25	16.28	12.24	0.58	0.44	0.04	0.71	100.09	0.72		73.5		734	66	129				9.2	78		41				7	19.8		18.6	3.62	1.09		0.66					1.54	0.33	1.42
MMB-18479	53.13	0.45	8.61	9.57		0.18	14.39	10.77	1.13	1.27	0.09	0.45	100.04	0.75		53.1	210	1163	46.7	171	59	69	9.5	39.2	133	19.4	41	3.4	2.3	356	11.8	27.8	3.93	17.3	4.36	0.9	4.24	0.67	4.02	0.82	2.24	0.32	2.04	0.32	1.45	0.53	3.55	1.17
MMB-284	59	0.51	15.25	6.69		0.11	5.29	7.72	2.56	1.44	0.07	0.83	99.47	0.61		27.3		146	22.7	40				40.4	236		64		3.2	596	9	19.5		8.7	2.13	0.68							1.44	0.17	1.55		2.61
MMB-293	58.36	0.53	15.44	6.8		0.13	5.29	7.67	2.75	1.37	0.11	0.67	99.12	0.61						38				34	354		93
MMB-342	56.91	0.48	15.64	7.55		0.14	5.21	8.26	2.65	1.27	0.16	1.23	99.5	0.58		28.3		149	24.7	33				29.8	352		43		1.7	366	13.2	25.6		14	2.98	0.92		0.38					1.1	0.25	1.4		2.07	0.86
MMB-351	51.88	0.46	16.21	9.63		0.18	6.94	10.17	2.56	0.44	0.18	0.72	99.37	0.59		39.8		173	32.3	28				13.8	399		22			176	6.7	15.2		8.9	2.16	0.81		0.41					0.8	0.22	0.79		0.93
MMB-351 dup	51.73	0.55	16.5	9.67		0.19	7.34	10.28	2.51	0.43	0.17	0.43	99.8	0.6		43.4	218	141		18	28	92		13.8	403	13	31			222
MMB-354	60.23	0.5	15.11	6.47		0.11	5.22	7.41	2.49	1.67	0.08	1.68	100.97	0.62		27.8		147	22.1	32				42.3	223		80		3.3	518	11.5	22.8		10.8	2.52	0.61							1.57	0.23	1.58		4.63
MMB-430A	57.95	0.49	16.47	6.34		0.12	4.97	7.67	2.7	1.1	0.1	1.07	98.98	0.61						31				30.5	323		72
MMB-796	55.79	0.72	16.36	8.17		0.15	5.18	8.22	2.67	1.58	0.24	0.66	99.73	0.56		30.1	203	105	41.5	17	68	82	18	46.1	407	14.7	75	4.8	3.4	597	15.7	27.5	3.47	15.5	3.64	1.2	3.23	0.47	2.92	0.64	1.7	0.26	1.59	0.25	1.83	1.51	2.14	0.87
MMB-833A	48.17	0.25	18.38	7.67		0.16	10.62	13.47	0.76	0.12	dl	0.84	100.41	0.73		43.8	240	270	41.3	25	31	49	12.9	2.1	286	3.4	11	3.8	0.5	85	2.2	4.5	0.64	3.2	0.91	0.46	0.99	0.16	1.1	0.26	0.7	0.1	0.65	0.1	0.38	0.65	0.09	0.05
MMB-833B	51.65	0.39	4.71	8.76		0.19	13.68	18.39	0.58	0.26	dl	0.66	99.27	0.76		110.2	579	1121	65.3	40	39	54	5.8	2.9	66	14.8	21	1.4	0.4	88	2.6	6.3	1.11	6.4	2.26	0.51	2.57	0.43	3.01	0.69	1.82	0.27	1.61	0.24	0.65	0.64	0.26	0.12
WCB-808	56.34	0.63	16.57	7.67		0.14	5.74	8.39	2.67	1.1	0.13	0.92	100.29	0.6		30.2	185	135		29	21	69		27.7	340	14.5	54	3.3	1.8	573	11.5	22.3	2.81	11.7	2.76	0.99	2.77	0.46	2.86	0.59	1.66	0.24	1.5	0.24	1.52	0.2	1.95	0.7
WCB-1408	59.54	0.61	16.14	6.63		0.12	4.81	7.74	2.72	1.22	0.1	0.87	99.63	0.59		29.4	165	107	21.3	28	65	66	14.7	32.8	245	14.9	53	4.6	3	818	9.9	18	2.27	10	2.43	0.78	2.38	0.37	2.53	0.58	1.61	0.26	1.61	0.25	1.35	0.23	1.43	0.72
WCB-2008	59.27	0.63	15.48	6.63		0.12	5	7.29	2.83	1.64	0.08	0.72	99.69	0.6		28.1	155	105	23.6	16	59	66	15.3	47.6	248	15	51	4.3	5.1	926	11	19.7	2.42	10.5	2.54	0.81	2.48	0.39	2.59	0.61	1.68	0.27	1.64	0.25	1.35	0.29	2.96	1.26
WCB-5109	57.73	0.59	16.24	6.61		0.12	5.46	7.75	2.75	1.34	0.09	0.93	99.61	0.62		29.3	156	149	23.9	29	58	64	15.4	43.1	256	13.7	42	3.8	4.8	531	9.8	17.4	2.2	9.7	2.37	0.76	2.32	0.37	2.44	0.56	1.58	0.25	1.55	0.25	1.16	0.23	2.34	1.04
WCB-5209	52.31	0.54	12.11	10.15		0.194	11.29	10.66	1.53	0.38	0.074	0.52	99.76	0.69		52.6	232	497	42	81	45	72	10.8	5.9	249	13.6	28	2	0.3	257	6.9	14.9	2.12	9.6	2.52	0.91	2.52	0.41	2.49	0.49	1.34	0.19	1.19	0.19	0.79	0.1	0.84	0.27
WCB-6509	49.9	0.18	15.82	7.72		0.16	11.18	12.14	0.67	0.24	dl	1.18	99.14	0.74		38.8	163	423		60	6	54		6.2	260	5.5	11	0.4	0.3	78	1.8	4	0.59	2.8	0.8	0.42	0.92	0.15	0.98	0.2	0.54	0.08	0.5	0.08	0.34	0.03	0.25	0.08
WCB6709	53.11	0.35	8.8	9.74		0.19	12.48	12.31	0.8	0.52	0.01	1.53	99.84	0.72		66.3	323	1030	49	94	84	65	8.7	9.5	133	12.3	31.6	2.6	0.7	166	5.2	10.9	1.6	7.8	2.24	0.59	2.24	0.35	2.27	0.52	1.39	0.21	1.29	0.19	0.88	0.37	1.18	0.6
WCB-6809	54.15	0.75	16.87	8.72		0.16	6.39	8.84	2.82	1.13	0.2	0.64	100.67	0.59		34.9	236	157	31.5	21	76	84	16.7	27.1	396	17.2	56	4.5	1.7	490	15.4	29.7	3.76	16.6	3.78	1.21	3.36	0.49	3.05	0.67	1.83	0.28	1.74	0.27	1.38	0.23	1.29	0.62
WCB-13210	50.35	0.55	3.13	9.92		0.16	21.92	11.65	0.36	0.55	dl	0.84	99.43	0.81		51	191	1921	67.9	134	119	61	5.4	19.1	33	12.4	50	1.7	1	374	4.4	10.6	1.66	8.5	2.4	0.56	2.32	0.36	2.29	0.5	1.36	0.21	1.27	0.19	1.24	0.08	0.5	0.27
WCB128A	52.79	0.67	13.72	9.86		0.21	9.19	9.61	2.23	0.41	0.2	0.99	99.87	0.65		46.5	228	480		46	dl	103			360	14.8	69			177
WCB133	50.81	0.5	14.29	9.54		0.19	9.24	11.35	1.91	0.4	0.08	0.48	98.79	0.66		47.6	248	378		37	92	83			338	11	25			223
WCB152	51.84	0.27	17.24	9.01		0.18	8.84	11.47	1.98	0.19	0	0.32	101.35	0.66		46.3	191	216		29	dl	76			317	7.7	13			153
WCB156	54.12	0.69	16.89	8.28		0.15	6.03	9.14	2.72	0.78	0.13	0.79	99.72	0.59		35.5	204	117		17	66	78			324	14.9	77			430
WCB5809	50.73	0.82	23.6	6.62		0.07	2.1	8.4	4.35	1.83	0.41	1.05	99.97	0.39		7.8	17	6		3	33	90			772	11.2	279			982
middle zone
MMB-137	55.72	0.68	17.69	7.78		0.13	3.83	7.66	3.49	1.42	0.22	1.13	99.75	0.49				70	20.2	15				34.3	509.5		87		1.7	527	16.6	40.2		27.8	5.28	1.43		0.88					1.95	0.4	2.7		1.73
MMB-145	56.23	0.76	17.5	7.54		0.13	3.66	7.24	3.43	1.54	0.2	0.78	99.01	0.49						17				45.1	458		114
MMB-191	52.05	0.81	17.52	9		0.16	5.82	10.17	2.89	0.78	0.22	0.89	100.3	0.56		37.9	268	59	39.7	17	52	75	18.4	15.9	451	22.8	57	6	0.9	276	15.5	31.4	4.35	19.7	4.93	1.36	4.3	0.63	3.96	0.88	2.4	0.37	2.25	0.34	1.5	0.89	2.34	0.92
MMB-194	57.03	0.72	17.38	7.62		0.14	3.45	7.37	3.29	1.5	0.23	1.15	99.88	0.47		21.2		48	20.3	19				36.1	454		100		1.5	561	13.3	31.8		16.4	3.96	1.32							2.1	0.26	2.66		1.08
MMB-777A	65.57	0.46	15.87	4.49		0.08	2.19	4.77	3.29	2.41	0.13	0.81	100.08	0.49		14.2	87	30	39.4	5	23	44	16.1	43	340	11.7	160	5.1	0.8	924	14.4	25.7	3.15	13.2	2.83	0.94	2.36	0.34	2.06	0.45	1.24	0.19	1.21	0.19	3.3	2.22	0.99	0.51
MMB-777B	53.09	0.77	17.18	2.32	6.68	0.16	5.81	9.69	3.16	0.87	0.26	0.82	100.81	0.54		37.6		113	42.9	25.6				24	502		98	6.5	1.2	353	14.5	30.5		18.3	4.24	1.28		0.53				0.62	1.87	0.26	1.82	1.2	1.47	0.76
MMB777B dup	51.2	0.72	18.01	9.12		0.17	5.91	9.83	2.97	0.9	0.25	0.9	99.97	0.56		37.1	229	82		12	16	87			504	16.7	86			357
WCB-6209	51.27	0.88	16.97	10.51		0.18	5.62	9.38	3.02	1.15	0.27	0.83	99.26	0.51		37.1	257	69	30.4	13	75	101	19.5	28.5	467	22.3	85	8.6	1.8	417	16.6	34	4.7	22.1	5.42	1.47	4.82	0.71	4.36	0.96	2.57	0.39	2.42	0.36	2.39	0.31	1.05	0.58
WCB-7109	56.2	0.75	17.09	8		0.15	4.31	7.74	3.07	1.5	0.27	0.9	99.08	0.52		28.5	200	38	21.9	7	56	86	17.6	44.9	413	19.2	108	5.7	3	474	20.3	37.5	4.7	20.3	4.53	1.28	3.8	0.55	3.38	0.74	2	0.31	1.93	0.3	2.58	0.33	4.55	0.75
WCB4809	53.01	0.88	18.35	8.55		0.14	5.23	8.94	3.05	1.15	0.26	0.91	100.46	0.55		31.1	189	70		10	34	84			510	20.6	156			521
WCB4909	52.83	0.85	18.17	8.41		0.14	5.08	8.88	3.03	1.08	0.25	1.03	99.75	0.54		31.3	183	69		14	71	84			501	21	155			512
WCB6209	52.05	0.91	16.92	10.39		0.19	5.7	9.3	3.01	1.17	0.28	0.89	100.79	0.52		37.7	257	66		11	66	99			460	21.6	90			413
Z5	64.69	0.55	16.19	4.75		0.07	2.6	5.35	3.72	1.56	0.17	0.62	100.26	0.52		13	91	32		5	-22	40			408	6.7	148			1518
upper zone
MMB-208	57.87	0.65	17.19	7.05		0.12	3.48	6.98	3.32	1.78	0.18	1.14	99.76	0.49		22.1	180.57	55	38	7	42	76	17.9	54	463	16.48	100	5.8	3.8	724	12.2	23.5	3.22	14.9	3.51	1.11	3.07	0.45	2.77	0.62	1.68	0.26	1.6	0.25	2.77	1.17	1.22	0.87
MMB-236A	53.7	0.89	16.41	10.44		0.17	5.53	9.36	2.77	1.43	0.19	dl	100.88	0.51		36.5	269	45		13	78	92		37.3	463	17.6	72	7	2.1	408	12.5	26.9	3.68	16.4	4.09	1.31	4	0.62	3.63	0.74	1.93	0.27	1.67	0.26	2.09	0.8	2.4	0.87
MMB-257A	43.01	1.09	22.98	10.82		0.17	6.52	13.36	1.04	0.06	0.37	0.62	100.04	0.54		38.4	422	71	35.8	21	70	70		2.2	630	8.4369	7	0.5	0.2	59	4.5	10.6	1.62	8.1	2.23	1.03	2.3	0.35	1.96	0.37	0.94	0.12	0.7	0.11	0.27	0.35	0.15	0.06
MMB-317	58.71	0.72	16.9	6.94		0.12	3.7	7.03	3.12	1.84	0.21	0.61	99.29	0.51		22.4	151	40	31.4	7	50	78	18.3	63.3	438	15.8	128	6	3.7	729	11.6	24.2	3.33	15.4	3.66	1.15	3.21	0.48	2.95	0.65	1.8	0.28	1.75	0.27	2.89	1	1.59	1
MMB-318	53.81	0.75	17.32	8.34		0.14	4.25	8.14	3.12	1.77	0.2	1.48	99.32	0.5		26.8		71	23.8	14				49.3	478		82		1.7	504	13.7	30.2		16.7	3.57	1.23							1.67	0.22	2.19		2.04
MMB-320	65.51	0.45	15.07	4.59		0.1	2.57	4.44	3.31	2.64	0.16	1.07	99.9	0.53		15.3	84	33	38.8	13	28	52	15.6	75.8	367	11	110	5.1	4.3	890	16.4	27.3	3.17	12.8	2.8	0.89	2.33	0.34	2.09	0.46	1.27	0.2	1.24	0.19	2.59	1.54	6.57	1.52
MMB-321	62.58	0.53	16.12	5.43		0.1	2.91	5.34	3.23	2.44	0.15	1.25	100.08	0.51		16.9	102	37	30.5	12	29	52	15.5	67.9	368	13.6	136	8	2.7	866	20.4	33.3	3.92	15.6	3.24	0.96	2.68	0.39	2.4	0.53	1.46	0.23	1.44	0.22	2.89	1.13	4.75	1
MMB-331	53.12	0.69	16.34	8.92		0.16	5.6	8.34	2.91	1.72	0.18	1.63	99.61	0.55		32.1		191	27.7	20				45.2	426		72		3.8	404	10.5	22.4		33.5	3.5	1.12		0.55					1.5	0.31	2.15		2.42
MMB-361	70.1	0.21	15.5	2.68		0.06	1.11	2.97	3.58	3.41	0.07	0.8	100.49	0.45		5.53		19	5.7					92.3	283		83		3.5	711	18.6	33.1		11.5	1.81	0.6		0.24					1.05	0.23	2.82	0.38	9.67
MMB-372A	70.65	0.27	14.37	2.55		0.06	1.16	2.9	3.71	3.34	0.08	0.48	99.57	0.47		6.7	33	15	35.5	5	16	34	14	126	272	7.8	88	6	13.2	777	14.3	21.1	2.42	9	1.97	0.6	1.47	0.22	1.29	0.29	0.84	0.14	0.94	0.16	2.27	1.92	9.24	2.2
MMB-374	69.09	0.28	16.12	2.99		0.08	0.81	3.25	3.75	3.19	0.12	0.52	100.21	0.35		4.8	10	4	25.9	4	11	33	16.2	116	409	11.5	138	7.9	6.5	902	22.5	37.9	4.25	16	2.96	1.03	2.28	0.33	1.92	0.42	1.19	0.19	1.25	0.2	2.94	1.48	6.94	1.62
MMB-376	74.34	0.07	14.28	0.59		0.01	0.13	1.05	4.25	4.67	0.02	0.41	99.81	0.3		1.4	6	2	46.6	2	5	17	18.2	120.04	166	9.4	62	5.9	3.4	407	14.7	20.5	2.18	8	2.13	0.38	1.73	0.29	1.77	0.36	0.91	0.14	0.88	0.13	2.34	0.9	7.87	2.32
MMB-377A	69.02	0.31	16.54	2.18		0.06	0.77	2.82	5.41	2.86	0.11	0.32	100.4	0.41		3	19	4	28.9	8	16	54	21.5	70.4	535	9.5	165	9	3.7	1118	15.9	29.6	3.68	15.1	3.14	1	2.32	0.31	1.75	0.36	0.99	0.15	0.97	0.15	3.61	1.67	3.13	1.05
MMB-379	55.95	0.59	16.18	7.83		0.15	5.24	7.83	3.04	1.44	0.18	1.31	99.74	0.57		22.3		132	21	27				40.8	409		86		1.9	401	11.6	27.3		2.8	3.21	1.1							1.95	0.2	2.07		1.31
MMB379 dup	56.38	0.65	16.66	7.78		0.15	5.42	7.96	3.03	1.49	0.21	1.26	101	0.58		27.5	165	142		16	dl	84			432	16.8	105			418
MMB-394	69.62	0.18	15.95	2.25		0.05	1.11	4.35	3.47	2.2	0.1	0.67	99.95	0.49		8.3	39	13	43.4	3	9	24	13.3	60.8	374	6.4	82	3.2	2.5	312	7.8	13	1.52	6.3	1.36	0.61	1.15	0.17	1.06	0.24	0.68	0.11	0.72	0.12	1.97	1.91	3.41	1.58
MMB-397	58.02	0.69	16.02	7.77		0.14	4.5	7.07	2.76	2.09	0.22	0.75	100.03	0.53		28.5	184	89	48.3	19	62	93	16.2	60.2	353	16.8	100	5.8	4.5	859	15.8	30.6	3.93	17.2	3.93	1.18	3.43	0.5	3.09	0.69	1.86	0.29	1.82	0.29	2.49	1.47	2.46	1.24
MMB-471	62.05	0.53	16.21	5.39		0.1	2.87	5.72	3.49	2.56	0.14	0.67	99.73	0.51		16.8	104	34	33	5	25	58	16.2	86.4	366	12	129	5.5	6.3	764	14.1	24.7	3.05	13	2.88	0.91	2.44	0.36	2.23	0.49	1.35	0.22	1.38	0.22	2.92	1.28	4.03	1.57
MMB-594	56.16	0.64	16.49	8.08		0.15	5.67	8.52	2.6	1.48	0.18	0.37	99.97	0.58		34	213	122	27.4	23	37	79	15.8	33.2	343	14.8	100	3.6	2.7	686	13.8	25.1	3.27	14.8	3.49	1.16	3.11	0.46	2.79	0.62	1.68	0.26	1.61	0.25	2.23	0.19	1.59	0.73
MMB-681Ah	57.71	0.66	17.08	7.46		0.14	4.4	7.42	3.06	1.17	0.24	0.62	99.97	0.54		24.8	168	47	35.5	9	47	75		34.6	485	17	95	5.3	1.8	454	13.3	31.9		17.9	4.17	1.25		0.55				0.45	1.88	0.27	3.01	1.07	1.4
MMB-685A	52.11	1	15.08	3.22	7.92	0.2	7.07	8.98	2.34	1.53	0.23		99.68	0.54
MMB-687	58.34	0.72	15.5	7.79		0.148	4.49	7.04	3.06	2.01	0.24	0.83	100.16	0.53		28.7	177	52	40.3	13	70	82	17.2	46.6	411	19	183	5.7	2.6	794	16.9	33.1	4.15	18.3	4.1	1.16	3.58	0.53	3.29	0.73	2	0.32	1.97	0.3	3.87	1.67	3.29	0.76
MMB687 - 1	57.71	0.72	15.58	7.83		0.15	4.36	7	3.06	2.03	0.24	0.8	99.48	0.52		27.2	166	55		8	71	83			397	17.7	157			786
WC-1	56.4	0.77	15.6	8.78		0.11	4.8	8	2.4	1.8	0.15	1.21	100.02	0.52
WC-2	64.6	0.43	15.4	5.09		0.13	2.4	4.8	3.1	2.5	0.08	1.22	99.75	0.48
WCB-2408	58.71	0.67	16.36	6.68		0.13	4.35	6.59	3.45	2.26	0.2	1.03	100.43	0.56		25.6	165	55	51.5	11	30	68	18.3	72.2	478	16.4	127	5.6	6.9	746	17.6	33.6	4.26	18.7	4.12	1.2	3.45	0.5	3.03	0.67	1.84	0.28	1.73	0.27	3.03	2.48	4.77	2.38
WCB-7709	56.31	0.7	17.98	7.23		0.14	4.03	7.53	3.42	1.9	0.26	0.72	99.5	0.52		25	189	46	21.8	7	59	86	18.9	50.9	467	16.8	173	7.6	2.8	651	14.1	28.1	3.75	16.9	3.94	1.2	3.43	0.5	3.13	0.69	1.89	0.3	1.85	0.28	3.59	0.34	14.82	6.04
Z1	58.59	0.71	16.83	6.95		0.13	3.82	7	3.27	1.74	0.22	0.98	99.27	0.52		22.8	148	39	19.6	10	42	77	17.9	49.298	450	16.1	165	5.7	3.2	648	15.4	29.3	3.86	17.2	3.94	1.16	3.37	0.5	3.05	0.67	1.84	0.28	1.78	0.28	3.55	0.34	3.59	2.75
mafic enclaves
MMB-122	49.84	1.11	18.1	10.62		0.17	5.35	9.39	3	0.83	0.29	0.74	99.44	0.5		33.1		37	26.4	13				14.2	431		50		0.5		13.4	27.8			4.37	1.46		0.71					2.37	0.4	1.89		0.98
MMB-135A	49.85	0.83	18.36	10.15		0.17	5.5	9.76	3.26	0.69	0.19	1.03	99.79	0.52		37.4	222	30	67.2	5	27	97	19.6	7.9	594	18.7	85	5.3	0.5	260	13.9	28.6	3.87	17.5	4.19	1.56	3.82	0.59	3.7	0.84	2.3	0.36	2.17	0.33	1	4.13	0.59	0.28
MMB-154A	52.6	0.73	16.1	10.2		0.2	6.52	9.57	2.84	0.89	0.21	1.02	100.88	0.56						25				16.4	406		61
MMB-154B	50.4	0.83	14.24	10.98		0.21	8.55	10.34	2.42	0.71	0.21	0.99	99.88	0.61						52				10.2	339		64
MMB-205	44.7	1.33	16.09	12.94		0.21	8.56	12.15	1.53	0.99	0.44	1.48	100.42	0.57						48				13.5	419		89
MMB-681Ae	49.68	1.04	18.15	1.99	7.37	0.2	6.55	8.68	2.92	1.05	0.18	1.56	99.37	0.56
MMB-681B	48.35	0.78	16.31	12.11		0.23	7.03	10.04	2.87	1.04	0.23	1.38	100.38	0.53		43.8	303	117	44	14	85	112	18.5	24.3	369	26.3	76	6	1.9	319	17.1	39	5.57	25.5	5.84	1.75	4.99	0.75	4.59	1.03	2.81	0.45	2.84	0.44	2.17	1.35	0.67	0.46
MMB-686B	55.8	0.7	16.26	8.13		0.156	4.93	7.78	3.21	1.41	0.22	0.96	99.57	0.55		26.1	169	106	38.7	25	145	92	18.6	53.1	420	17.5	121	5.8	3.5	553	13.8	29.4	4.03	18.2	4.24	1.3	3.71	0.55	3.4	0.75	2.06	0.32	2.01	0.32	2.48	1.62	1.25	0.79
MMB-686C	55.19	0.67	14.41	9.36		0.2	6.18	7.87	2.71	1.49	0.2	1.62	99.88	0.57		31	181	192	40.4	15	93	99	15.9	53	324	20.9	93	6.1	3.3	347	16.7	35.1	5	22.4	5.14	1.43	4.38	0.66	4.1	0.9	2.47	0.4	2.47	0.39	2.44	1.62	2.66	1.08
MMB-686D	56.25	0.65	14.66	8.8		0.18	5.58	8.14	2.99	1.36	0.2	0.96	99.76	0.56		30.9	215	142	46.2	16	161	93	16.9	39.3	403	20	127	7.8	2.5	458	16.4	34.4	4.82	21.7	4.95	1.48	4.3	0.63	3.99	0.88	2.44	0.38	2.41	0.38	3.14	2.11	1.74	0.68
MMB-686E	55.51	0.74	16.73	0	10.06	0.13	4.77	6.97	3.04	1.32	0.22	1.2	100.69	0.46		21.5		57	29.9					32.2	457		103		1.2	541	14.6	29.7		16.3	3.16	1.06		0.52					1.87	0.26	2.16	1.14	1.76
MMB-686F	60.1	0.77	14.63	1.38	6.3	0.15	5.2	6.96	2.72	1.41	0.22	dl	99.84	0.55
MMB-766	51.4	0.75	13.81	10.06		0.19	8.18	9.8	2.87	0.9	0.18	1.15	99.31	0.62		29.2	225.39	379.08	45.17	54.59	114.42	97.93	13.64	18.3	468	29.43	64.95	5.8	0.64	262	13.83	30.17	4.31	20.42	5.18	1.35	4.42	0.66	4.11	0.89	2.36	0.36	2.12	0.32	1.71	0.81	0.73	0.31
MMB-783A	55.36	0.72	14.29	9.11		0.18	5.43	7.8	3.26	2.24	0.21	1.05	99.66	0.54		33.5	252	119	38.9	16	6	80	15.9	81.8	407	17	95	6.4	5	353	15.7	28.5	3.54	15.9	3.76	1.02	3.43	0.51	3.26	0.73	1.95	0.3	1.87	0.29	2.25	1.18	4.32	1.58
MMB-783B	56.57	0.75	14.71	9.22		0.17	5.19	7.7	3.23	1.86	0.2	0.66	100.27	0.53				124.24	32.4		12	72	15.3	67.5	376.8	17.1	75	4.9	5.3	329.9	15.8	28.1	3.4	14.9	3.54	1.08	3.23	0.48	3.05	0.68	1.81	0.28	1.72	0.27	1.92	1	4.09	1.51
MMB-808A	48.39	0.82	13.5	11.56		0.3	10.17	10.68	2.28	1.27	0.19	1.01	100.17	0.64		39.1	209	593	41.8	86	320	124	15.4	25.2	325	22.3	61	5.5	1.6	275	15.4	32.6	4.38	19.1	4.37	1.59	3.77	0.57	3.46	0.77	2.09	0.33	2.02	0.31	1.13	0.27	0.73	0.39
MMB-808C	48.2	1.26	16.65	11.93		0.23	7.39	9.11	2.72	1.53	0.31	1.15	100.48	0.55		42.1	240	217	33.6	27	125	120	18.4	41.7	440	24	126	6.8	2.4	545	16.3	35	5.05	23.3	5.72	1.74	5.09	0.76	4.73	1.03	2.78	0.43	2.55	0.38	0.77	0.32	0.69	0.51
MMB-843B	47.82	0.98	17.25	10.93		0.21	7.01	10.02	3.46	1.46	0.27	1.03	100.44	0.56		40.7	226	91	33.2	20	285	123	19.5	42.1	465	23	106	5.2	1.6	632	18.2	38.3	5.22	23.4	5.43	1.61	4.52	0.65	4	0.89	2.4	0.37	2.34	0.36	2.19	0.26	0.81	0.45
MMB-845	48.48	0.91	17.91	10.19		0.19	6.02	9.48	3.29	1.3	0.38	0.86	99	0.54			276	36	41	16	51	106	21.5	44.3	468	20.9	104	5.8	1.9	424	17.9	37.3	5.14	22.9	5.27	1.56	4.36	0.63	3.83	0.86	2.29	0.36	2.18	0.34	2.25	0.75	0.65	0.39
mafic synplutonic dikes
MMB-18879	54.13	0.76	15.03	8.58		0.164	7.3	9.27	2.53	0.87	0.19	1.17	99.99	0.63		38.1	212	193	35.9	32	75	75	16	22.1	296	16	90	5.4	0.9	333	10.9	21.7	3.02	14.4	3.62	1.14	3.27	0.49	3.11	0.7	1.88	0.29	1.78	0.27	2.15	0.55	1.52	0.91
MMB-19279	51.7	0.77	10.85	9.84		0.18	10.88	11.85	1.52	0.4	0.24	1.27	99.5	0.69		49	268	606	57.5	71	226	106	15.7	3	228	17.9	58	5.3	0.2	161	13.1	29	4.12	18.6	4.37	1.17	3.76	0.54	3.32	0.72	1.95	0.3	1.86	0.29	1.53	0.71	1	0.46
MMB-201	50.61	0.81	14.45	8.68		0.14	10.11	7.88	3.06	0.5	0.16	3.29	99.69	0.7		25	182	618	40.2	316	79	74		10.3	365	16.5	68	2		254	7.3	18.4		9.9	2.81	0.92		0.53					1.49	0.22	1.73		0.54
MMB-201 dup	50.35	0.84	14.43	8.51		0.15	10.66	7.91	3.14	0.49	0.17	2.83	99.47	0.71		25.4	173	829		412	85	85			397	13.2	67			244
MMB-207	55.19	0.79	8.03	1.54	7.37	0.21	12.39	11.18	1.44	0.59	n.d.	0.72	99.89	0.72		62.1	308	519		140	114	84		11	134	26.5	50	5		115
MMB-231A	48.03	1.27	11.86	15.16		0.29	8.71	9.22	1.81	1.39	0.36	1.17	99.27	0.53		55.4	348	146	48.4	18	31	151	17.9	29.6	171	37.2	175	9.5	1	421	21.9	55.1	7.67	37.1	9.37	1.97	8.1	1.19	7.32	1.63	4.4	0.68	4.15	0.63	4.36	0.69	4.97	1.78
MMB-638	54.55	0.52	7.58	0.8	7.31	0.17	12.88	12.33	1.36	0.65	0.07	1.45	99.67	0.74		50.8	207	326		118	29	71		12	109	16.8	49	2		154
MMB-639	48.27	1.19	17.18	9.99		0.15	7.06	10.59	2.73	0.9	0.33	0.85	99.24	0.58		37.3	268	161	48.5	50	77	83		16	443	30.1	49	4	0.6	476	16.2	39.7		21.8	5.3	1.59		0.77				0.71	2.63	0.41	2.09	1.18	0.7
MMB-682A	61.33	0.65	16.62	1.4	4.17	0.12	3.38	5.62	3.41	1.85	0.16	1.17	99.88	0.53		18.6	119	29		b.d.	16	68		57	365	18	88	7		755
MMB-683	49.47	0.76	13.51	10.13		0.19	10.45	11.24	2.06	0.62	0.24	1.5	100.18	0.67		43.8	230	616		68	79	84		12	348	21.7	47	7		253
MMB-765C	44.88	1.81	18.88	3.03	8.36	0.21	5.83	10.1	2.23	1.27	0.5	2.24	100.19	0.48		37.6	171	43		11	80	137		30	759	39.8	113	12		632
MMB-770	46.28	1.27	15.74	12.68		0.23	9.27	12.07	1.69	0.83	0.37	0.74	101.19	0.59		55.1	297	238		39	91	112		15	382	33.1	55	7		365
MMB-771	49.92	1.01	17.55	10.27		0.19	6.02	9.92	2.64	0.72	0.27	0.93	99.44	0.54		41.1	250	115	41.5	13	52	101	20.6	11.8	486	24.7	92	6	0.2	328	14.6	31.9	4.58	21.5	5.33	1.53	4.73	0.7	4.38	0.97	2.63	0.4	2.43	0.37	2.13	1.2	0.63	0.31
MMB-772	49.23	1.06	16.16	11.76		0.21	7.19	10.4	2.54	0.77	0.28	0.89	100.49	0.55		46.4	310	125		20	137	108		14	384	30.4	43	6		269
MMB-775A	49.47	1.08	13.51	1.92	8.77	0.2	9.91	11.23	2.17	0.47	0.25	0.91	100.76	0.63		53.9	307	410	34.5	40	113	87		6	270	27.3	49	3		222	5.6	14.9		8.3	2.64	0.88		0.55					1.51	0.21	1.39	0.6	0.85
MMB-775B	51.54	1.11	17.1	9.62		0.18	6.84	9.66	2.85	0.96	0.28	0.95	101.09	0.58		38.4	264	175		59	106	83		19	443	30.1	69	6		410
MMB-776	47.42	0.82	12.09	2.83	8.77	0.23	12.35	11.9	1.22	0.56	0.29	1.31	99.78	0.66		50.8	273	694	40.3	80	164	99		10	227	23.5	35	3	0.5	147	7.5	19		11.5	2.73	0.93		0.47					1.55	0.18	1.3	0.63	0.59
MMB-824	46.48	0.89	12.44	1.7	10.39	0.24	10.83	13.52	1.19	0.6	0.39	0.62	100.33	0.62		56.2	305	602		52	86	109		5	244	27.5	47	2		139
MMB-834	44.59	1.05	14.55	1.43	10.96	0.23	10.58	12.81	1.7	0.46	0.28	0.96	99.59	0.61		57.2	369	169		b.d.	32	98		7	276	29.7	32	5		163
felsic dikes in WCB
MMB-147	77.76	0.04	13.42	0.18		0.01	0.1	0.88	5.75	1.42	0	0.6	100.16	0.52		1.1	5	4	28.3	5	8	3	10.3	25	135	3.4	43	4.2	0.7	580	6.1	9.9	1.03	3.7	0.67	0.35	0.46	0.07	0.42	0.11	0.35	0.07	0.48	0.08	1.69	1.84	6.11	2.14
MMB-169	75.42	0.02	14.34	0.41		0.12	0.08	0.64	4.91	4.08	0.02	0.46	100.5	0.28		4.7	0	2	38.9	3	6	9	18.6	208	19	20.8	53	21.2	12	68	14.2	24.4	2.76	10.1	2.84	0.06	3	0.54	3.41	0.69	1.71	0.27	1.63	0.23	0.91	5.1	13.16	3.59
MMB-292B	75.48	0.01	13.49	0.49		0.15	0.04	0.69	4.58	4.02	0	0.23	99.15	0.14		3.9	0	3	30.7	5	5	8	16.6	182	13	41.7	66	10.3	12.7	27	7.1	12.7	1.78	8.2	3.07	0.08	4.59	0.95	7.33	1.7	4.68	0.78	4.7	0.67	2.26	2.22	12.62	3.48
MMB-341	73.67	0.03	13.85	0.26		0.01	0.08	1.2	4.61	3.4	0.02	0.36	97.49	0.38		1.7	0	2	45.5	2	21	9	13.6	77.6	48	6.4	115	4	1.3	64	17.3	26.8	2.77	9.6	1.73	0.23	1.18	0.15	0.89	0.23	0.78	0.15	1.13	0.2	3.81	2.38	16.18	3.86
MMB-350B																0.91	4	4	30.2	4	11	3	9.5	61	234	2.2	55	4.4	1.3	2111	12.5	21.8	2.34	8.4	1.3	0.66	0.64	0.07	0.32	0.07	0.22	0.04	0.31	0.06	1.34	1.52	6.1	1.71
MMB-430B	74.73	0.02	14.58	0.29		0.02	0.1	0.7	4.92	4.49	0.01	0.32	100.17	0.41		2.2	2	2	37.7	2	6	4	12	139	59	17.1	55	10	8.9	461	10.8	17.2	1.8	6	1.49	0.12	1.61	0.3	2.22	0.55	1.58	0.26	1.69	0.27	1.29	2.99	9.25	5.69
roof-zone dikes
MMB-163C	55.57	0.97	16.6	9.03		0.16	3.73	7.55	2.79	2.56	0.44	0.69	100.08	0.45		27.3	248	33		14	39	79		71	510	28.2	203	17		604
MMB-164B	57.66	0.84	14.97	8.4		0.15	4.82	6.81	2.84	2.23	0.24	1.01	99.97	0.53		28	197	178	34.5	53	72	72		81.6	401	22.6	119	8	6	525	17.5	36	4.73	19.7	4.56	1.26	4.27	0.65	3.8	0.76	2.04	0.29	1.8	0.29	3.16	0.8	4.7	1.72
MMB-233B	57.78	0.55	18.32	7.43		0.19	2.8	5.01	5.85	1.63	0.2	1.05	100.8	0.43		15	172	45		68	52	70		36	623	20.3	81	3		925
MMB-233C	71	0.26	15.21	3.6		0.08	0.65	2.35	4.1	2.81	0.09	0.43	100.58	0.26		3.1	18	15		21	19	55		86	273	14.4	159	9		1073
MMB-547	51.42	1.08	17.26	9.92		0.19	4.96	8.11	1.97	1.4	0.23	1.04	97.57	0.5		31.1	288	20		3	29	112		47	402	26.5	76	3		443
MMB-548	63.07	0.49	15.57	5.41		0.11	2.92	5.09	3.5	2.58	0.16	0.86	99.75	0.52		16.7	109	29	28.5	5	34	74		75	423	12.7	118	5.1	3.2	805	19.4	34.8		17.6	3.27	0.97		0.44					1.77	0.23	3.48	1.22	5.87	2.4
MMB-550C	51.32	0.87	16.02	11.17		0.19	5.2	8.01	2.75	1.53	0.26	1.74	99.06	0.48		40.1	316	31		11	23	100		47	5	22	57	3		320
MMB-550R	54.71	0.85	15.72	10.92		0.2	4.71	8.18	1.81	1.67	0.27	1.5	100.55	0.46		34.7	286	25		8	44	118		50	479	23	59	1		331
MMB-551	66.6	0.37	14.8	3.4		0.06	1.94	4.56	3.62	3.1	0.11	0.71	99.27	0.53		11.2	57	29	25.4	5	15	42	15.4	74.7	389	9.6	136	5.1	2.3	892	16	25	2.76	11	2.25	0.75	1.88	0.28	1.69	0.38	1.05	0.17	1.08	0.17	2.86	1.14	5.69	1.73
MMB-551P	55.73	0.81	16.77	2.29	5.73	0.08	4.11	5.91	3.28	2.55	0.35		97.61	0.48						17				68	495		170	7.4
MMB-553	57.83	0.79	15.49	7.69		0.14	4.79	7.32	2.97	2.39	0.24	1.16	99.66	0.55		26.7	169	79	27.3	11	76	84	17	75.4	450	17.7	124	6.2	7.5	535	18.2	37.2	4.86	20	4.52	1.27	4.12	0.62	3.53	0.72	1.92	0.27	1.71	0.27	2.95	0.72	4.01	1.96
MMB-554	58.69	0.75	15.02	7.59		0.14	4.53	6.84	2.99	2.3	0.23	1.17	100.23	0.54		25.2	170	134	40.1	14	98	77		71	442	18.8	113	7	4.3	611	21.3	44.4		23	4.81	1.28		0.65					1.96	0.31	3.78	1.07	5.76	2.87
MMB-555	51.99	0.89	15.9	10.23		0.18	5.74	9.41	2.73	1.41	0.21	0.74	99.43	0.53		37.7	304	46	32.1	10	36	84	16.7	38.7	431	18.3	75	4	2.4	401	11.5	24.5	3.44	15.3	3.84	1.2	3.9	0.62	3.68	0.75	2.01	0.28	1.79	0.29	2.05	0.54	2.22	0.81
MMB-557	57.83	0.74	15.85	7.54		0.13	4.8	7.22	3.01	2.27	0.21	0.86	100.47	0.56		25.8	167	103		15	63	70		68.4	454	17.3	131	8	2.9	600	18.8	37.2	4.91	20.4	4.5	1.27	4.04	0.61	3.51	0.7	1.87	0.27	1.69	0.26	3.18	0.37	5.31	1.95
MMB-561A	55.17	0.58	14.32	8.41		0.17	8.17	9.36	2.61	0.67	0.05	1.41	100.92	0.66		43.6	230	387		45	30	66		14	256	19	45	2		339
MMB-562	55.05	0.64	16.53	9.86		0.17	4.87	8.2	1.83	2.1	0.09	1.21	100.54	0.49		34	245	55		14	80	81		65	442	17	44	2		956
MMB-565	57.34	0.6	15.44	8.4		0.16	5.62	8.03	2.76	0.98	0.14	1.43	100.89	0.57		31.8	191	154		65	55	73		19	287	18.5	63	4		501
MMB-567A	53.22	0.75	13.32	1.99		0.21	9.02	9.33	1.95	1.45	0.19	1.23	92.66	0.9		33.8	205	752		120	8	91		37	261	24	81	3		392
MMB-569B	52.08	0.94	16.66	10.17		0.18	5.04	8.04	2.87	1.45	0.32	1.79	99.54	0.5		38.6	282	36		15	107	61		44	503	24	78	2		436
MMB-572A	53.14	0.87	14.85	10.08		0.17	6.04	8.57	2.56	1.15	0.24	1.43	99.09	0.54		37.2	255	70		6	2	81		37	432	21.8	73	7		630
MMB-573	58.23	0.76	16.61	7.43		0.1	3.32	7.35	3.1	2.42	0.25	1.24	100.8	0.47		23.6	179	54		18	81	56		87	469	20.5	122	5		556
MMB-574	52.05	0.69	12.26	0.88	7.87	0.18	11.45	8.5	2.09	1.16	0.18	1.51	98.81	0.7		33.3	221	1068		218	9	73		37	324	21.6	65	4		404
MMB-575	54.1	0.77	14.94	9.82		0.19	5.67	8.97	2.08	0.94	0.33	1.68	99.49	0.53		33.7	218	70		0	15	95		42	488	23.2	103	4		453
MMB-576	55.18	0.82	15.96	9.66		0.19	4.89	8.63	2.1	1.22	0.34	1.39	100.37	0.5		32.5	210	84		13	19	132		45	533	25.3	96	8		554
MMB-579	71.92	0.24	14.33	0.05	1.66	0.04	0.88	2.05	2.65	4.72	0.04	0.39	98.97	0.48		6.2		16	39.7	8.9				1334	265		190	6.1	3.3	832	26.9	39.8		11.3	2.33	0.64		0.32					1	0.14	3.23	2.56	19.62	4.37
MMB-581	55.28	0.75	15.93	9.05		0.16	4.73	8.03	2.55	1.7	0.24	1.36	99.77	0.51		31.6	232	114		42	66	92		49	370	19.9	71	7		421
MMB-584	58.84	0.64	15.74	1.49	5.01	0.13	4.19	6.74	3.13	2.14	0.19	1.04	99.28	0.54		25.3	164	81		13	95	66		63	432	19.6	107	5		632
MMB-586	59.61	0.79	17.72	6.19		0.1	1.61	5.54	3.46	2.32	0.26	1.4	98.99	0.34		13	131	16		2	63	62		73	513	20	135	10		659
MMB-587	63.74	0.57	15.66	5.78		0.11	2.53	4.51	3.17	2.17	0.16	1.25	99.65	0.46		14.6	118	59		29	8	54		66	375	12	122	8		711
MMB-589	57.43	0.54	16.03	7.83		0.15	5.37	7.8	2.55	0.92	0.1	1.81	100.53	0.58		36.5	230	132		11	64	63		25	311	16.2	53	3		453
MMB-590	52.27	0.63	14.6	8.87		0.17	10.03	10.86	1.58	0.44	0.06	0.73	99.52	0.69		39.5	201	484	46.6	73	20	80	14.1	11.3	250	14.2	40	3	1.8	209	5.3	10.1	1.42	7	1.99	0.74	2.22	0.36	2.5	0.59	1.62	0.26	1.6	0.24	0.99	0.71	0.87	0.4
MMB-592	54.07	0.45	12.59	1.52	6.27	0.16	9.87	8.94	2.41	1.17	0.1	1.35	98.9	0.7		39	190	619		85	3	58		26	319	14.6	46	0		348
MMB-593	58.15	0.51	13.62	0.9	5.81	0.13	6.04	7.11	2.62	2.03	0.14	1.47	98.53	0.62		32.7	189	277		37	63	58		57	318	16.7	72	6		662
MMB-600A	52.92	0.36	5.8	10.33		0.22	14.45	12.92	0.87	0.46	0.08	1.28	99.67	0.73		65.5	273	1099		95	8	65		9	93	15	23	1		202
MMB-600B	53	0.53	13.25	9.5		0.18	8.45	10.01	1.87	0.81	0.14	1.67	99.4	0.64		45.1	193	358		40	46	69		17	262	20	39	3		244
MMB-601	51.19	0.67	13.29	9.79		0.17	8.94	10.36	1.6	0.66	0.11	1.27	98.05	0.64										10.6	267		46	3		387
MMB-603A	61.9	0.4	17.43	1.67	4.27	0.14	2.55	6.31	3.04	1.08	0.14	1.23	100.16	0.44		17.1	136	13		9	13	66		25	421	15.6	59	1		690
MMB-612	60.67	0.53	16.02	6.36	0	0.11	3.14	6	3.33	2.36	0.16	1.41	100.09	0.49		19.9	132	52		15	92	61		65	376	16.2	96	4		766
MMB-628HA	63.78	0.53	16.16	0	5.75	0.09	1.93	4.17	3.18	1.14	0.47		97.2	0.37
MMB-635A	47.1	0.86	14.29	9.42		0.2	10.16	12.07	1.54	1.18	0.08	1.59	98.48	0.68		83.8	371	380		83	42	75		35	301	20.2	35	3		382
MMB-636A	56.47	0.79	16.01	8.54		0.14	4.82	7.52	2.99	1.66	0.23	1.32	100.48	0.53		30.4	203	116		56	5	53		64	463	22.7	91	5		471
MMB-637	58.15	0.79	15.23	8.17		0.15	4.85	7.3	2.77	2.26	0.23	0.29	100.19	0.54		27.4	192	149		49	168	68		78	420	21.7	119	8		528
MMB-649	55.49	0.9	18.24	8.58		0.15	3.7	8.44	2.7	0.8	0.14	1.24	100.38	0.46		26.1	160	13		21	22	86		24	183	24.5	81	6		222
MMB-651	56.46	0.74	16.09	8.71		0.17	4.55	8.05	2.48	1.15	0.19	1.14	99.73	0.51		33.2	193	57		18	7	84		36	329	20.9	70	7		459
MMB-653	54.36	0.4	11.84	7.21		0.14	12.19	7.2	1.99	0.83	0.08	2.54	98.79	0.77		26.3	132	392		316	8	71		19	192	14.7	64	1		454
MMB-660	53.3	0.67	12.65	2.01	7.23	0.18	9.16	9.52	1.9	0.58	0.14	1.4	98.74	0.64		42	230	606		50	48	71		16	224	18.8	50	2		286
MMB-665	57.45	0.6	14.21	8.14		0.15	5.65	7.77	2.5	1.5	0.16	1.86	99.99	0.58		32.5	206	187		26	64	63		43	320	18	78	7		506
MMB-666	56.46	0.83	15.49	1.65	6.08	0.16	4.74	7.06	2.77	1.93	0.24	1.3	98.69	0.53		29.5	216	120		17	76	66		68	412	21.2	99	9		499
MMB-669A	56.25	0.48	15.87	2.23	4.87	0.2	5.5	7.97	2.77	0.82	0.15	1.96	99.05	0.59		36.2	189	112		26	93	74		19	373	24.8	21	3		403
MMB-670C	62.26	0.38	16.07	1.32	3.98	0.14	2.76	5.78	3.07	1.11	0.12	2.01	99	0.49		17.6	124	22		0	8	56		25	411	13.8	45	3		527
MMB-689	48.99	2.86	13.87	2.55	11.09	0.23	4.4	8.74	3.41	0.96	0.5	dl	97.59	0.37		38.7	420	15		1	88	119		20	452	32	132	11		405
MMB-693	59.32	0.76	15.83	7.04		0.125	4.05	5.6	3.47	2.2	0.2	1.54	100.13	0.53		23.8	128	34	30.5	7	10	78	17	63.5	470	16.6	129	8.3	6.4	841	16.2	29.3	3.72	16.3	3.75	1.18	3.26	0.49	2.97	0.66	1.78	0.27	1.71	0.27	2.97	1.57	4.05	1.9
MMB-697	63.95	0.59	15.79	0.7	4.41	0.09	2.72	5.03	3.39	2.47	0.13	1.22	100.49	0.49
MMB-699	62.07	0.96	16.74	1.6	4.64	0.09	1.95	4.87	3.06	3.06	0.27	0.7	100.01	0.36
MMB-704	55.02	0.8	17.51	9.11		0.16	4.83	8.22	2.97	1.39	0.19	1.06	100.18	0.51			191	79	47.7	17	30	64	17.4	73	394	16.8	88	6.7	6.8	384	18.3	34.2	4.3	18.4	4.16	1.13	3.31	0.48	2.87	0.63	1.71	0.26	1.63	0.25	2.36	2.33	5.13	2.29
MMB-705A	53.57	1.15	15.09	1.5	7.2	0.09	5.79	6.44	2.69	1.72	0.17		95.41	0.55
MMB-751A	48.28	0.86	17.31	0.56	10.31	0.22	7.17	11.9	1.97	0.12	0.21	1.15	100.06	0.54		47.1	359	118		14	30	95		6	491	13.5	3	2		90
MMB-781A	54.71	1.02	15.7	8.81		0.16	5.56	7.93	2.81	1.68	0.26	1.26	99.9	0.56		31.3	204	90	48	9	11	83	16.9	53.102	430	19.5	113	10.5	3.2	458	15.1	29.8	4.01	18.4	4.44	1.36	3.99	0.59	3.73	0.82	2.17	0.33	1.99	0.3	2.52	1.84	2.62	1.07
MMB-781B	52.87	0.81	16.61	8.74		0.15	4.97	7.38	3.15	2.71	0.29	1.65	99.33	0.53		29.4	226	16	36.7	4	52	98	16.6	125	473	19.5	110	6	8.2	620	22.6	43.3	5.64	24.8	5.54	1.5	4.61	0.65	3.78	0.8	2.08	0.31	1.88	0.29	2.42	1.19	3.8	1.28
MMB-781C	64.51	0.43	15.36	4.53		0.09	2.66	4.88	3.2	3.53	0.14	0.85	100.16	0.54		17.5	97	37	38.2	10	80	101	17.6	104	434	18.7	123	6.1	3.8	787	22.7	45.2	5.4	24.3	5.5	1.49	4.58	0.65	3.75	0.79	2.08	0.31	1.86	0.29	2.34	1.35	3.65	1.3
MMB-782	62.46	0.52	15.4	5.24		0.1	2.98	5.88	3.2	3.14	0.16	0.75	99.83	0.53		17.5	113	32	42.2	4	17	49	15.8	93.7	414	14.5	121	6.2	4.2	658	17.7	31.5	3.72	15.6	3.38	0.89	2.91	0.44	2.7	0.61	1.66	0.27	1.7	0.27	3.12	3.06	7.48	3.14
MMB-783C	67.61	0.34	14.93	3.42		0.06	1.85	4.1	3.01	3.72	0.11	0.75	99.89	0.52		10.8	69	20	27.7	3	62	28	14.1	81.8	381	10.5	90	4.5	1.9	813	11.3	19.4	2.28	9.5	2.11	0.73	1.76	0.26	1.65	0.37	1.02	0.17	1.07	0.18	2.03	2.02	7.23	1.93
WCB-9109	57.96	0.8	15.06	8.03		0.14	5.17	7.68	2.79	2.34	0.21	1.29	100.19	0.56		29	183	111	26.2	18	112	66	16.5	88.9	422	19	125	6.6	11	548	16.7	32.3	4.23	19.1	4.47	1.23	3.89	0.56	3.43	0.75	2.03	0.31	1.91	0.29	2.93	0.45	3.9	1.95
Method and data sources
Sample		majors	trace	REE etc	sources			explanation
								major elements
								UO = x-ray fluorescence
Slinkard pluton								Sul Ross = x-ray fluorescence
CAII		UO	UO		1, 3			TTU = inductively-coupled plasma atomic emission spectroscopy
CAIII		UO	UO	WSU	1, 3, 5
CAIV		UO	UO	WSU	1, 3, 5			trace element
MMB-53		UO			1, 3			UO = one or more of Rb, Sr, Zr, Y, Nb, Ba by x-ray fluorescence
MMB-642A		Sul Ross	Sul Ross	UTEP	1, 3			Sul Ross = one or more of Rb, Sr, Zr, Y, Nb, Ba by x-ray fluorescence
MMB-642B		UO	UO		1, 3			TTU = Sr, Zr, Y, Nb, Ba, Sc, V, Cr, Ni, Cu, Zn, Be by inductively-coupled plasma atomic emission spectroscopy; Rb y flame atomic emission spectroscopy
MMB-645A		Sul Ross	Sul Ross	UTEP	1, 3
MMB-645B		Sul Ross	Sul Ross		1, 3			REE etc
SL15		UO	UO		1, 3			UO = REE, Ba, Cr, Sc, Hf, U, Th Ta by INAA
SL20		UO	UO		1, 3			UTEP = REE, Ba, Cr, Sc, Hf, U, Th Ta by INAA
SL51IIA		UO	UO		1, 3			WSU = all trace elements by inductively-coupled plasma mass spectrometry
SL60A		UO	UO		1, 3			TTU = all trace elements except Sc by inductively-coupled plasma mass spectrometry
SL71A		UO			1, 3
SL95A		UO	UO		1, 3			FeO by titration, Texas Tech
SL117A		UO	UO	UTEP	1, 3
SL147		UO	UO		1, 3			1. C. M. Allen MS thesis
SL149		UO	UO	UTEP	1, 3			2. Barnes (1983)
SL284A		UO	UO		1, 3			3. Barnes et al. (1986a)
SL286A		UO	UO		1, 3			4. Barnes et al. (1990)
WCB-2108		TTU	TTU	TTU	5			5. This study.
WCB-8309		TTU	TTU	WSU	5			6. USGS; Hotz
WCB-8409		TTU	TTU	TTU	5
WCB-8909		TTU	TTU	TTU	5
WCB-9009		TTU	TTU	TTU	5
Wooley Creek batholith
lower zone
MMB-15		UO	UO	UO	2, 3
MMB-30		TTU	TTU	TTU	2, 3, 5
MMB-100 dup		UO	UO	UO	2, 3
MMB100.79 - 1		TTU	TTU		5
MMB-10379		TTU	TTU	TTU	2, 3, 5
MMB-11179		TTU	TTU	TTU	2, 3
MMB-121		UO	UO		2
MMB-128A		UO	UO		2
MMB-171		UO	UO	UO	2
MMB-18479		TTU	TTU	TTU	2, 5
MMB-284		UO	UO	UO	2, 3
MMB-293		UO	UO		2
MMB-342		UO	UO	UO	2
MMB-351		UO	UO	UO	2
MMB-351 dup		TTU	TTU		5
MMB-354		UO	UO	UO	2
MMB-430A		UO	UO		2
MMB-796		TTU	TTU	TTU	2, 4
MMB-833A		TTU	TTU	TTU	2, 4
MMB-833B		TTU	TTU	TTU	2, 4
WCB-808		TTU	TTU	WSU	5
WCB-1408		TTU	TTU	TTU	5
WCB-2008		TTU	TTU	TTU	5
WCB-5109		TTU	TTU	TTU	5
WCB-5209		TTU	TTU	WSU	5
WCB-6509		TTU	TTU	WSU	5
WCB6709		TTU	TTU	TTU	5
WCB-6809		TTU	TTU	TTU	5
WCB-13210		TTU	TTU	TTU	5
WCB128A		TTU	TTU		5
WCB133		TTU	TTU		5
WCB152		TTU	TTU		5
WCB156		TTU	TTU		5
WCB5809		TTU	TTU		5
middle zone
MMB-137		UO	UO	UO	2
MMB-145		UO	UO		2
MMB-191		TTU	TTU	TTU	2, 5
MMB-194		UO	UO	UO	2, 4
MMB-777A		TTU	TTU	TTU	2, 4, 5
MMB-777B		TTU	TTU	UTEP	2, 4
MMB777B dup		TTU	TTU		5
WCB-6209		TTU	TTU	TTU	5
WCB-7109		TTU	TTU	TTU	5
WCB4809		TTU	TTU		5
WCB4909		TTU	TTU		5
WCB6209		TTU	TTU		5
Z5		TTU	TTU		5
upper zone
MMB-208		UO	UO	TTU	2, 5
MMB-236A		TTU	TTU	WSU	2, 5
MMB-257A		TTU	TTU/WSU	WSU	2, 5
MMB-317		TTU	TTU	TTU	2, 5
MMB-318		UO	UO	UO	2
MMB-320		TTU	TTU	TTU	2, 5
MMB-321		TTU	TTU	TTU	2, 5
MMB-331		UO	UO	UO	2
MMB-361		UO	UO	UO	2
MMB-372A		TTU	TTU	TTU	2, 5
MMB-374		TTU	TTU	TTU	2, 5
MMB-376		TTU	TTU	TTU	2, 5
MMB-377A		TTU	TTU	TTU	2, 5
MMB-379		UO	UO	UO	2
MMB379 dup		TTU	TTU		5
MMB-394		TTU	TTU	TTU	2, 5
MMB-397		TTU	TTU	TTU	2, 5
MMB-471		TTU	TTU	TTU	2, 5
MMB-594		TTU	TTU	TTU	2, 5
MMB-681Ah		TTU	TTU	TTU	3, 5
MMB-685A		TTU			3
MMB-687		TTU	TTU	TTU	3, 5
WC-1		USGS	USGS		6
WC-2		USGS	USGS		6
WCB-2408		TTU	TTU	TTU	5
WCB-7709		TTU	TTU	TTU	5
Z1		TTU	TTU	TTU	5
mafic enclaves
MMB-122		UO	TTU	UO	2, 5
MMB-135A		UO	TTU	TTU	2, 5
MMB-154A		UO	TTU		2
MMB-154B		UO	TTU		2
MMB-205		UO	TTU		2
MMB-681Ae		Sul Ross	Sul Ross	TTU	3
MMB-681B		TTU	TTU	TTU	3, 5
MMB-686B		TTU	TTU	TTU	3, 5
MMB-686C		TTU	TTU	TTU	3, 5
MMB-686D		TTU	TTU	TTU	3, 5
MMB-686E		Sul Ross	Sul Ross	UTEP	3
MMB-686F
MMB-766		TTU	TTU	WSU	3, 5
MMB-783A		TTU	TTU	TTU	3, 5
MMB-783B		TTU	TTU	TTU	3, 5
MMB-808A		TTU	TTU	TTU	3, 5
MMB-808C		TTU	TTU	TTU	3, 5
MMB-843B		TTU	TTU	TTU	3, 5
MMB-845		TTU	TTU	TTU	3, 5
mafic synplutonic dikes
MMB-18879		TTU	TTU	TTU	3, 5
MMB-19279		TTU	TTU	TTU	3, 5
MMB-201		UO	TTU	UTEP	3
MMB-201 dup		TTU	TTU		5
MMB-207		UO	TTU		2
MMB-231A		TTU	TTU	TTU	3, 5
MMB-638		TTU	TTU		3
MMB-639		TTU	TTU	UTEP	3
MMB-682A		TTU	TTU		3
MMB-683		TTU	TTU		3
MMB-765C		TTU	TTU		3
MMB-770		TTU	TTU		3
MMB-771		TTU	TTU	TTU	3, 5
MMB-772		TTU	TTU		3
MMB-775A		TTU	TTU	UTEP	3
MMB-775B		TTU	TTU		3
MMB-776		TTU	TTU	UTEP	3
MMB-824		TTU	TTU		3
MMB-834		TTU	TTU		3
felsic dikes in WCB
MMB-147		TTU	TTU	TTU	2, 5
MMB-169		TTU	TTU	TTU	2, 5
MMB-292B		TTU	TTU	TTU	2, 5
MMB-341		TTU	TTU	TTU	2, 5
MMB-350B		TTU	TTU	TTU	2, 5
MMB-430B		TTU	TTU	TTU	2, 5
roof-zone dikes
MMB-163C					3
MMB-164B		TTU	TTU	TTU	3, 5
MMB-233B		UO	TTU		3
MMB-233C		UO	TTU		3
MMB-547		UO	TTU		3
MMB-548		UO	TTU	UTEP	3
MMB-550C		UO	TTU		3
MMB-550R		UO	TTU		3
MMB-551		TTU	TTU	TTU	3, 5
MMB-551P		UO	TTU		3
MMB-553		TTU	TTU	TTU	3, 5
MMB-554		UO	TTU	UTEP	3
MMB-555		TTU	TTU	TTU	3, 5
MMB-557		TTU	TTU	TTU	3, 5
MMB-561A		UO	TTU		3
MMB-562		UO	TTU		3
MMB-565		UO	TTU		3
MMB-567A		UO	TTU		3
MMB-569B		UO	TTU		3
MMB-572A		UO	TTU		3
MMB-573		UO	TTU		3
MMB-574		UO	TTU		3
MMB-575		UO	TTU		3
MMB-576		UO	TTU		3
MMB-579		UO	UO	UTEP	3
MMB-581		UO	TTU		3
MMB-584		UO	TTU		3
MMB-586		UO	TTU		3
MMB-587		UO	TTU		3
MMB-589		UO	TTU		3
MMB-590		TTU	TTU	TTU	3, 5
MMB-592		UO	TTU		3
MMB-593		UO	TTU		3
MMB-600A		UO	TTU		3
MMB-600B		UO	TTU		3
MMB-601		UO	UO		3
MMB-603A		UO	TTU		3
MMB-612		UO	TTU		3
MMB-628HA		UO			3
MMB-635A		UO	TTU		3
MMB-636A		UO	TTU		3
MMB-637		UO	TTU		3
MMB-649		UO	TTU		3
MMB-651		UO	TTU		3
MMB-653		UO	TTU		3
MMB-660		UO	TTU		3
MMB-665		UO	TTU		3
MMB-666		UO	TTU		3
MMB-669A		UO	TTU		3
MMB-670C		UO	TTU		3
MMB-689		UO	TTU		3
MMB-693		TTU	TTU	TTU	3, 5
MMB-697		Sul Ross			3
MMB-699		TTU			3
MMB-704		TTU	TTU	WSU	3, 5
MMB-705A		TTU			3
MMB-751A		TTU	TTU		3
MMB-781A		TTU	TTU	TTU	3, 5
MMB-781B		TTU	TTU	TTU	3, 5
MMB-781C		TTU	TTU	TTU	3, 5
MMB-782		TTU	TTU	WSU	3, 5
MMB-783C		TTU	TTU	TTU	3, 5
WCB-9109		TTU	TTU	TTU	3, 5
